# Supplementary material
Source: publisher figshare collection journal article supplement (https://karger.figshare.com/ndownloader/files/38935244)
Supplement: Supplementary file 1 [file 38935244]

**Supplementary Figure Legends**

Supplementary Fig. 1 – Forest plot of clinical success after endoscopic treatment

Supplementary Fig. 2 – Forest plot of surgical reintervention after endoscopic treatment

Supplementary Fig. 3 – Forest plot of time until AL resolution according to treatment (EVT *versus* stent placement)

Supplementary Fig. 4 - Forest plot of endoscopic reintervention according to treatment (EVT *versus* stent placement)

Supplementary Fig. 5 – Forest plot of overall complications according to treatment (EVT *versus* stent placement)

Supplementary Fig. 6 - Forest plot of hospital length of stay according to treatment (EVT *versus* stent placement)

Supplementary Fig. 7 - Forest plot of ICU length of stay according to treatment (EVT *versus* stent placement)
